1     **The Quick and the Dead: Microbial Demography at the Yeast**

2                                     **Thermal Limit**

3                                     Colin S. Maxwell<sup>1</sup> and Paul M. Magwene<sup>1\*</sup>

4

5     1. Department of Biology, Duke University, Durham, NC 27708, USA

6     \* To whom correspondence should be addressed. Email: paul.magwene@duke.edu

7     Dryad data archive DOI: doi:10.5061/dryad.8kn73

8

9

10

11

12

13     **Keywords:** single-cell analysis, demography, *Saccharomyces cerevisiae*, heat stress,  
14     ecological niche, mitochondrial inheritance

## 15 **Abstract**

16       The niche of microorganisms is determined by where their populations can  
17 expand. Populations can fail to grow because of high death or low birth rates, but  
18 these are challenging to measure in microorganisms. We developed a novel  
19 technique that enables single cell measurement of age-structured birth and death  
20 rates in the budding yeast, *Saccharomyces cerevisiae*, and used this method to study  
21 responses to heat stress in a genetically diverse panel of strains. We find that  
22 individual cells show significant heterogeneity in their rates of birth and death  
23 during heat stress. Genotype-by-environment effects on processes that regulate  
24 asymmetric cell division contribute to this heterogeneity. These lead to either  
25 premature senescence or early life mortality during heat stress, and we find that a  
26 mitochondrial inheritance defect explains the early life mortality phenotype of one  
27 of the strains we studied. This study demonstrates how the interplay of physiology,  
28 genetic variation, and environmental variables influences where microbial  
29 populations survive and flourish.

30

## 31 **Introduction**

32 Population growth rate is arguably the most measured variable in all of  
33 microbiology. It is used to study the effects of genetic mutations (Breslow et al.  
34 2008), as an indicator of physiological stress (Warringer et al. 2003), as a read-out  
35 of selection (Vasi, Travisano, and Lenski 1994), and as a proxy for fitness (Joseph  
36 and Hall 2004). However, net population growth rate is itself a composite function  
37 of the birth and death rates of individuals and measuring only the population  
38 growth rate confounds them. Furthermore, birth and death rates frequently change  
39 with the age. Because analyses of population growth play such a critical role in  
40 studies of microbes, disentangling the effects of birth, death, and aging on  
41 population growth should lead to a better understanding of microbial physiology,  
42 ecology, and evolution.

43 The range of environmental conditions where the population growth rate of a  
44 species is positive corresponds to what the ecologist G. E. Hutchinson called a  
45 species' fundamental niche (Hutchinson 1957). The limits of a species' fundamental  
46 niche are determined by a combination of physiological, genetic, and demographic  
47 factors. One strategy for identifying specific factors that limit the environments  
48 where an organism can live is to dissect the demographic mechanisms that drive  
49 decreases in population growth rate when a population is exposed to conditions  
50 near those limits. Is a decrease in population growth rate driven by a population  
51 wide decline in reproductive output as environmental conditions approach their  
52 limit? Alternately, are there increases in mortality, perhaps in an age-structured

53 manner, that limit growth? How do such environmentally induced shifts in  
54 demographic parameters vary with genetic background? Questions like these can  
55 only be addressed by characterizing the fecundity, mortality, and age of individuals  
56 in populations. Such individual level characterization is particularly challenging in  
57 microbes due to their small size, large populations, and the consequent challenges of  
58 tracking or recovering individual cells.

59 Temperature is an environmental variable that plays a critical role in limiting the  
60 fundamental niche of microorganisms. Although the total temperature range over  
61 which microbial life is found is quite large (at least -5°C to 113°C, (Pikuta, Hoover,  
62 and Tang 2008)) most species are confined to a relatively modest range of  
63 temperatures that support robust growth. The ability to maintain a relatively high  
64 growth rate at high temperatures is thought to be critical to the ecological success of  
65 the budding yeast *Saccharomyces cerevisiae*. *S. cerevisiae* is able to grow at higher  
66 temperatures relative to closely related species (Salvadó et al. 2011; Warringer et al.  
67 2011). Thermo-tolerance also varies widely between strains of *S. cerevisiae* (Liti et  
68 al. 2009) and has a complex genetic basis (Steinmetz et al. 2002; Sinha et al. 2006).  
69 This genetic diversity for growth at high temperatures may also affect human  
70 health; a high thermal limit has been hypothesized to contribute to the  
71 opportunistic invasion of human hosts by *S. cerevisiae* (McCusker et al. 1994).

72 Using a newly developed method, called TrackScar, that allows us to  
73 simultaneously measure the birth rate, viability, and age of individual cells, we  
74 analyzed a genetically diverse panel of yeast strains during growth near their upper

75 thermal limits. We find that disparate demographic and physiological responses  
76 limit population growth of different strains during heat stress. Furthermore, the  
77 age-structure of mortality can differ with genetic background, leading to both  
78 “premature senescence” as well as “early life mortality.” We show that in one  
79 genetic background early life mortality likely results from a temperature sensitive  
80 mutation affecting mitochondrial inheritance. By measuring the demographic rates  
81 of individuals, we elucidate the diverse physiological and demographic factors that  
82 limit the niche of budding yeast.

## 83 **Results**

### 84 **TrackScar measures the fecundity and mortality of single cells**

85 During the process of asexual mitotic reproduction (budding) in *S. cerevisiae* and  
86 related yeasts, ring-shaped scars of chitin are formed on the cell wall at the site of  
87 cytokinesis in both mother and daughter cells. These rings, known as “bud scars”,  
88 provide a cellular record of the number of daughters an individual cell has  
89 produced. Bud scars can be visualized using fluorescently labeled compounds that  
90 preferentially bind to chitin (Pringle 1991). Wheat germ agglutinin (WGA), a lectin,  
91 is a particularly suitable bud scar stain because it can be conjugated to a  
92 variety of fluorophores and has low background staining of the cell wall.

93 We developed an experimental method called “TrackScar” for measuring the  
94 reproductive output (fecundity) of individual yeast cells based on the sequential  
95 staining of bud scars (Fig. 1a,b). The principle behind TrackScar is simple: 1) label a

96 population of yeast cells at two time points ( $t_0, t_1$ ), using different fluorophores at  
97 each time (e.g. cyan at  $t_0$ , yellow at  $t_1$ ); 2) image cells that were stained at both time  
98 points; and 3) quantify the number of cell divisions individual cells have undergone  
99 in the given time interval by counting the difference in the number of bud scars  
100 produced (e.g. no. of yellow scars – no. of cyan scars). The number of daughter cells  
101 produced in a given time interval is a discrete and unambiguous measure of the rate  
102 of fecundity at the single cell level. Detailed experimental procedures are provided  
103 in the supplementary information.

104 Exposing cells to stressful conditions is often accompanied by a decrease in  
105 fecundity, with extreme stress leading to cell death. Since two-color TrackScar only  
106 measures the number of daughters that a cell produces in one interval, it is possible  
107 that cells with low observed fecundity could have died before the first stain (WGA  
108 stains both live and dead cells), or in the interval between stains. In order to  
109 distinguish between slowly dividing but still viable cells and cells that are dead, the  
110 TrackScar method can be extended to include a “recovery phase” (in this case six  
111 hours) under permissive growth conditions (30°C), followed by staining with a third  
112 fluorophore. Assuming the recovery phase is sufficiently long, cells that show at  
113 least one reproductive event during the recovery phase are still viable; cells that  
114 show no growth during recovery are either dead or severely growth arrested (Fig.  
115 1c,d). Three-color TrackScar provides more information about individual cells, but  
116 data collection is more difficult because mother cells are further diluted during the  
117 recovery phase and because more bud scars must be counted.

118 We performed control experiments to demonstrate that: 1) TrackScar is  
119 sensitive; 2) that staining cells using WGA does not affect their division rate; 3) and  
120 that six hours of recovery is sufficient to distinguish live from dead cells. These  
121 results are described in the Supplementary Information.

## 122 **Identifying diverse responses to heat stress**

123 The fundamental niche of a species is limited by the range of temperatures  
124 ('thermal limits') in which it can survive. Within a species the thermal limit can vary  
125 substantially, reflecting genetic diversity. To disentangle the demographic basis of  
126 heat sensitivity we applied TrackScar to a genetically diverse panel of *S. cerevisiae*  
127 strains growing in a range of thermal regimes.

## 128 **Identifying slow growing yeast populations**

129 We estimated the maximum population growth rates for a panel of 93 sequenced  
130 yeast strains (Strope et al. 2015) across a range of temperatures from 21°C to 40°C  
131 by measuring the time-varying optical density of liquid cultures grown in a  
132 spectrophotometer (Fig. S3). At low temperatures, we observed only small  
133 differences between genetic backgrounds in their population growth rates. However  
134 at 35.5°C and above there is substantial strain-to-strain variation.

135 To identify heat sensitive versus robust strains, we calculated the ratio of  
136 maximum growth rates at 35.5°C, a potentially stressful temperature with high  
137 between-strain variance, relative to 30°C, a standard permissive temperature.  
138 Strains with a thermal growth ratio near 1.0 were considered robust to thermal

139 stress, while those with ratios significantly lower than 1.0 were classified as heat  
140 sensitive (Fig. 2a).

141 TrackScar provides a richer view of how population fecundity changes across  
142 environments than measuring only the population growth rate. For example, Figure  
143 2b illustrates how the population distributions of fecundity change over a  
144 temperature range of 30°C to 40°C for diploid S288c cells. S288c grows well at both  
145 30°C and 35.5°C. By contrast, at higher temperatures the distribution of fecundities  
146 shifts left and there is a noticeable increase in the variance.

### 147 **Heat sensitivity is associated with the emergence of heterogeneous** 148 **subpopulations**

149 We examined the distributions of fecundity for strains that were both sensitive  
150 and robust to heat stress. At 30°C most strains exhibit unimodal and approximately  
151 symmetric fecundity distributions (Fig. S4), although the mean and variances of  
152 fecundity differ between backgrounds. At 35.5°C robust strains continue to exhibit  
153 symmetrical fecundity distributions, with only modest differences in mean  
154 fecundity. By contrast, many sensitive strains (Fig. 3; Fig. S4) have asymmetric  
155 fecundity distributions, with a substantial increase in slow growing or non-growing  
156 cells, even leading to bimodal distributions (Fig. 3; Fig. S4).



157 **Increased mortality explains slow population growth for some heat**

158 **sensitive strains**

159 One mechanism that could lead to asymmetric and bimodal fecundity  
160 distributions we observe during heat stress is if some cells died before or during the  
161 interval in which we observe their fecundity. To explore this possibility, we used the  
162 three-color TrackScar assay to test whether cells with low fecundity during heat  
163 stress were viable when the stress is removed. We focused our analyses on three  
164 strains – S288C, YJM693, and YJM996 – that have distinct fecundity distributions  
165 near their thermal maxima (Fig. 2b, Fig. 3). Since S288C does not exhibit a growth  
166 rate decrease at 35.5°C, we assayed this strain at 40°C, a temperature where it  
167 exhibits a distinct decrease in fecundity and a large number of non-dividing cells.  
168 The other two strains were assayed at 35.5°C. We measured fecundity for six hours  
169 during heat stress, incubated the cells overnight at 4°C, then transferred the cells to  
170 30°C and measured the number of divisions during a subsequent six-hour period.

171 We used three-color TrackScar to determine whether increased mortality  
172 explained the low observed fecundity of cells during heat stress. We compared the  
173 number of daughters produced *during heat stress* of cells that either survived or  
174 died during heat stress with the fecundity of unstressed cells. S288C cells with low  
175 fecundity during heat stress are frequently alive at the end of the period of stress  
176 (Fig. 4). In contrast, viable YJM996 cells frequently produce as many daughters as  
177 unstressed cells, but with a broad distribution. Remarkably, and in contrast with the  
178 other two strains we examined, the distribution of fecundity among YJM693 cells

179 that survived heat stress was identical to that of unstressed cells (Kolmogorov-  
180 Smirnov test;  $p = 0.64$ ). This indicates that heat stress causes YJM693 cells to split  
181 into a population of quickly dividing viable cells and another population of unviable  
182 cells. Taken together, these results show that in some genetic backgrounds mortality  
183 can be the sole cause of slow population growth during heat stress, while in other  
184 strains a combination of increased mortality and reduced individual fecundity  
185 occurs.

### 186 **Fecundity can be positively or negatively associated with age during stress**

187 Yeast mother cells faithfully segregate sub-cellular components to their daughter  
188 cells, but also asymmetrically retain aging factors such as damaged proteins and  
189 mitochondria (Lai et al. 2002) (McFaline-Figueroa et al. 2011; Aguilaniu et al. 2003).  
190 Genetic variation could lead to temperature sensitive mutations that affect either of  
191 these processes, which could lead to lower fitness in either younger or older cells,  
192 respectively. Since TrackScar works by measuring the replicative age of a cell at the  
193 beginning and end of an experiment, the age structure of fecundity emerges  
194 naturally during analysis. We will call a group of cells with the same replicative age  
195 at the beginning of the experiment a “cohort.” To gather sufficient data about older  
196 cohorts, we sought out and imaged old cells rather than imaging random cells (see  
197 methods).

198 We measured the average fecundity of cohorts of cells in the strains YJM693,  
199 YJM996, and S288C. To test whether fecundity was affected by age, we excluded the  
200 fecundity of daughter cells because the fecundity of daughters is lower than mothers

201 due to an extended G1 phase of the cell cycle (Hartwell and Unger 1977)(Fig. S1b).  
202 At 30°C, the average fecundity of cohorts of YJM693 increased slightly with age,  
203 whereas the fecundity of cohorts of YJM996 was not significantly affected by age  
204 (Fig. 5a)(linear model,  $p = 0.016$  and  $p = 0.68$ , respectively). The average fecundity  
205 of a cohort of S288C was not affected by its age at any temperature (Fig. S5). In  
206 contrast, at 35.5°C, replicative age significantly affects the average fecundity of a  
207 cohort in the strains YJM693 and YJM996 (linear model,  $p = 0.0006$  and  $p = 0.0008$ ,  
208 respectively). Interestingly, while YJM693 cells produce an average of  $0.21 \pm 0.12$   
209 *fewer* daughters in six hours per cohort when heat stressed, YJM996 cells produce  
210 an average of  $0.33 \pm 0.17$  *more* daughters in six hours per cohort (intervals are 95%  
211 confidence intervals of the mean)(Fig. 5a).

## 212 **Heat stress can cause premature senescence or early life mortality**

213 The fecundity of YJM693 cells is lower in older cells (Fig. 5a). YJM693 cells  
214 that divided less than four times during a six-hour period of heat stress were dead  
215 by the end of the experiment (Fig. 4). Consistent with this, we found that the older a  
216 cohort of cells was, the more cells in that cohort failed to divide at least four times in  
217 six hours—indicating they had died (Fig. 5b). Since, by definition, each cell in a cohort  
218 had survived at least long enough to enter the cohort, this indicates that the  
219 likelihood of death increases with replicative age at 35.5°C in YJM693 and cannot be  
220 explained by a model of constant survival risk. Using logistic regression, we estimate  
221 that there is a 21% (95% CI  $\pm 6\%$ ) increase in the probability of death for each  
222 additional unit of replicative age in this strain during heat stress. These results

223 suggest that thermal stress affects an asymmetrically inherited aging factor in this  
224 genetic background.

225 In contrast to our findings for YJM693, the fecundity of YJM996 cells is higher in  
226 older cells (Fig. 5a). Although not all cells with low fecundity in YJM996 died during  
227 the exposure to stress, cells that produced no daughters during the six hours of  
228 growth at 35.5°C were viable less than 5% of the time (Fig. 4). Therefore, we  
229 considered these cells dead for the purpose of estimating age-structured mortality.  
230 Younger cohorts in the YJM996 genetic background have substantially higher  
231 mortality than older cohorts. More than 80% of the youngest cells did not produce a  
232 daughter cell during 6 hours of recovery at 30°C, which strongly suggests that they  
233 had died (Fig. 5b). Cohorts that had divided only one or two times also had  
234 substantially elevated mortality. In contrast, cells in cohorts six and above showed  
235 substantially reduced mortality (Fig. 5b). YJM996 thus exhibits an early life  
236 mortality phenotype during heat stress. Interestingly, the high mortality of young  
237 cells leads older cells to accumulate in the population (Fig. S6). This pattern of  
238 mortality in young cells is consistent with heat stress impacting the segregation of a  
239 critical cellular component.

240

### 241 **Early life mortality is associated with a failure to inherit mitochondria**

242 The early life mortality phenotype of YJM996 during heat stress suggests that this  
243 strain may have a temperature-sensitive defect in the segregation of some cellular

244 component to daughter cells. Previous studies have shown that failure to properly  
245 segregate mitochondria (e.g. in an *Δmmr1* strain) leads to sub-populations of short-  
246 and long-lived cells (McFaline-Figueroa et al. 2011), which could generate mortality  
247 patterns similar to the ones in YJM996. We examined the morphology of  
248 mitochondria at both 30°C and 35.5°C in strains YJM693, YJM996, and S288C using a  
249 mitochondrially localized GFP expressed from a low copy number plasmid. Since  
250 this plasmid was uracil selectable, we used *Δura3* derivatives of these strains and  
251 grew them in synthetic media lacking uracil.

252       The strain YJM996 has a temperature sensitive defect in mitochondrial  
253 morphology and inheritance. In S288C and YJM693, at both 30°C and 35.5°C, the  
254 mitochondria form a branching, thread-like network. In contrast, the mitochondria  
255 of YJM996 grown at 35.5°C formed large globular clumps (Fig. 6). This globular  
256 morphology was also present with low (~10%) penetrance at 30°C (Fig. S7). We  
257 noticed that the buds of YJM996 cells often lacked mitochondria even near the end  
258 of mitosis (Fig. 6), suggesting that the mitochondria of this strain may be inherited  
259 inefficiently. Consistent with this, at 30°C and 35.5°C, approximately 10% and 75%,  
260 respectively, of YJM996 cells lack mitochondria entirely (Fig. S7). We observed cells  
261 lacking mitochondria to contain nuclei (Fig. 6) and vacuoles, suggesting that the  
262 inheritance of other organelles is not affected. Since mitochondria cannot be created  
263 *de novo* and must be inherited from mother cells, this indicates that mitochondrial  
264 inheritance is inhibited by high temperatures in YJM996.

265 We hypothesized that this mitochondrial inheritance defect was the cause of the  
266 early life mortality phenotype in YJM996. Consistent with this, we found that  
267 YJM996 cells that lack mitochondria divide fewer times than cells that contain  
268 mitochondria at both 30°C and 35.5°C (Fig. S8). Globular mitochondria were found  
269 with low frequency at 30°C, and we hypothesized that these mitochondria would be  
270 associated with slower growth. However, cells with globular mitochondria produced  
271 the same number of daughters as cells with wild-type mitochondria, whereas cells  
272 without mitochondria produced few or no daughters at either temperature (Fig. S8).  
273 This indicates that mortality in this strain is not caused by a defect in mitochondrial  
274 morphology *per se*, although the altered morphology of the mitochondria could  
275 contribute to the defect in inheritance. Taken together, these results strongly  
276 suggest that YJM693 grows slowly at elevated temperatures due to a defect in the  
277 segregation of mitochondria, leading to high mortality in young cells.

## 278 Discussion

279 We have dissected the demographic mechanisms that delimit the fundamental  
280 niche of genetically diverse *S. cerevisiae* strains. The growth rate of a population of  
281 microbes in the laboratory at a particular temperature can accurately predict the  
282 actual environments (the niche) in which a microbe can thrive (Madigan et al.  
283 2015). However, the growth rate is the sum of the rates of birth and death, and the  
284 effect of temperature on growth rate could be due to a change in either. We  
285 developed TrackScar to measure age-structured rates of birth and death in

286 populations of budding yeast without the need for trapping or microscopic tracking  
287 of cells. TrackScar simplifies experimental design and opens the door to studies of  
288 microbial demography in environments inaccessible to microscopic tracking of  
289 individuals.

290         Single-celled organisms rarely behave identically, even if they share the same  
291 genome and the same environment. Random events like stochastic gene expression  
292 can cause such differences (Spudich and Koshland 1976; Maamar, Raj, and Dubnau  
293 2007; Bumgarner et al. 2012). However, predictable events such as cell cycle and  
294 aging (Avery 2006; Levy, Ziv, and Siegal 2012), and epigenetic inheritance of growth  
295 rate (Ziv, Siegal, and Gresham 2013; Levy, Ziv, and Siegal 2012) can also contribute.  
296 Genetic variation can impact cellular individuality, indicating that it could be  
297 selected for during evolution (Ziv, Siegal, and Gresham 2013; Fehrmann, Bottin-  
298 Duplus, et al. 2013; Holland et al. 2013). This individuality makes the average a poor  
299 predictor of the behavior of individuals, and can obscure the physiological basis of  
300 population-level phenotypes.

301         Heat stress often causes extensive variability in the fitness of individual cells,  
302 as shown by the asymmetric and frequently bimodal distributions of the fecundity  
303 we observed. This variability can be age structured, and in at least one case is a  
304 consequence of the failure of cells to appropriately segregate sub-cellular  
305 components (see below). The ability to easily distinguish mother and daughter cells  
306 in budding yeast make these patterns particularly apparent, but subtle asymmetries  
307 also lead to aging in ostensibly symmetrically dividing organisms such as

308 *Escherichia coli* (Stewart et al. 2005). We speculate that genetic variation in cellular  
309 mechanisms that establish or normalize asymmetries between mother and daughter  
310 cells may be an important cause of phenotypic variability in other organisms.

311         Active processes ensure that sufficient quantities of organelles and other  
312 sub-cellular components are segregated to daughter cells (Chernyakov, Santiago-  
313 Tirado, and Bretscher 2013; Marston 2014) while at the same time damaged  
314 proteins, organelles and other aging factors are asymmetrically retained in the  
315 mother cell, eventually leading to senescence (Lai et al. 2002; McFaline-Figueroa et  
316 al. 2011; Aguilaniu et al. 2003; Sinclair and Guarente 1997; Dillin, Gottschling, and  
317 Nyström 2014). Mutations affecting these two processes could lead to different  
318 demographic outcomes. Aberrant production or distribution of an asymmetrically  
319 distributed factor could lead to premature aging, whereas the failure to produce or  
320 distribute a critical sub-cellular component could lead to newly born cells dying.

321         We found that fecundity and mortality were age-structured in two clinical  
322 isolates. In the strain YJM693, older cohorts showed lower fecundity and higher  
323 mortality, indicating that YJM693 cells senesce prematurely at elevated  
324 temperatures. Whatever causes senescence in budding yeast must be  
325 asymmetrically retained in mother cells (Kennedy, Austriaco, and Guarente 1994). A  
326 number of molecular mechanisms are associated with senescence in good  
327 conditions in yeast including autonomously replicating circularized rDNA, damaged  
328 vacuoles and mitochondria, and the aggregation of damaged proteins (Lai et al.  
329 2002; McFaline-Figueroa et al. 2011; Aguilaniu et al. 2003; Sinclair and Guarente



330 1997; Dillin, Gottschling, and Nyström 2014), although some of these remain  
331 controversial (Fehrmann, Paoletti, et al. 2013). We speculate that the strain YJM693  
332 contains a temperature sensitive mutation in a gene required for normal replicative  
333 lifespan.

334 In contrast to the strain YJM693, older cells in the strain YJM996 were more  
335 fecund than younger cells. The low fecundity of young cohorts in these strains is  
336 partly, but not entirely, due to very high mortality in young cohorts. In contrast, the  
337 mortality of older cohorts is low, leading them to accumulate in the population. The  
338 force of natural selection on fecundity of a cohort scales with the relative  
339 survivorship of that cohort (Hamilton 1966). This implies that natural selection on  
340 the fecundity of older cells is much stronger in this strain, but only during heat  
341 stress.

342 The early life mortality of YJM996 is linked to a defect in mitochondrial  
343 inheritance. YJM996 cells contain mitochondria with an aberrant globular  
344 morphology during heat stress, and daughter cells in this strain frequently fail to  
345 inherit mitochondria. Although mtDNA is dispensable in *S. cerevisiae*, the  
346 mitochondria themselves are essential (Kispal et al. 2005; Chernyakov, Santiago-  
347 Tirado, and Bretscher 2013; Frederick, Okamoto, and Shaw 2008). This strongly  
348 suggests that the failure to inherit mitochondria causes the high mortality in young  
349 cells in this strain, although we cannot rule out that other essential components may  
350 fail to be segregated as well.

351 Genetic variation affects the relative contribution of mortality and fecundity to  
352 stress-induced changes population growth rate. For example, increased mortality  
353 was both necessary and sufficient to explain the slow growth of the clinical isolate  
354 YJM693. Cells that survived chronic heat stress in this strain had fecundity identical  
355 to unstressed cells, whereas nearly all cells with low fecundity were dead. In  
356 contrast, cells with low fecundity during heat stress in the clinical isolate YJM996 or  
357 the genomic reference strain S288C are sometimes alive. Our results indicate that  
358 changes in population growth rate should be interpreted cautiously, since they can  
359 reflect the effects of distinct demographic mechanisms.

360 The ability to grow at high temperatures in the presence of alcohol is a key  
361 innovation critical to the ecological success of *Saccharomyces cerevisiae* (Goddard  
362 2008). In this study, we examined the standing genetic variation present within *S.*  
363 *cerevisiae* for the ability to grow at high temperatures. The ability of cells to grow at  
364 high temperatures has been hypothesized to be a trait that enables pathogenesis in  
365 yeast, but we show that clinical isolates can also be sensitive to heat. Thermal  
366 tolerance in yeast is a genetically complex trait (Steinmetz et al. 2002; Sinha et al.  
367 2006), and consistent with this we found that heat can operate on distinct  
368 demographic functions to lower growth rate, reflecting effects on different cellular  
369 processes involved in asymmetric division in budding yeast. Our results connect  
370 physiology to demography, and shed light on how genetic variation affects the  
371 thermal limits of budding yeast.

372

## 373 **Methods**

374 All of our experiments were conducted using clonal populations grown in YPD or  
375 in SC-ura media when a plasmid was used. Before staining, cells were propagated  
376 for at least 16 hours in log-phase growth at the temperature being surveyed. Cells  
377 were first stained with Alexa488-conjugated wheat germ agglutinin (WGA) for 15  
378 min. Cells were washed once in YPD and diluted to  $0.33 \times 10^6$  cells/ml, then grown  
379 for six hours. Cells were then fixed in PBS + 8% formaldehyde, and stored until  
380 imaging. Before imaging, cells were stained as above with tetramethylrhodamine  
381 (TMR)-conjugated WGA. Widefield Z-stacks were acquired, deconvolved, and then  
382 processed using a maximum pixel intensity projection. The numbers of buds stained  
383 by each dye were counted by manually from these projections. At least 150 fields of  
384 view which contained at least one cell with the first stain were collected for each  
385 biological replicate. This number was chosen to keep the acquisition time required  
386 for a biological replicate of a two-color experiment below one hour. Growth curves  
387 were collected on a Tecan Sunrise over a 48hr period with measurements every 15  
388 minutes. See Supplementary Information for detailed methods including for three-  
389 color TrackScar.

## 390 **Acknowledgements**

391 We acknowledge Nicolas Buchler, Daniel Lew, Daniel Skelly, and Helen Murphy  
392 for helpful comments on the manuscript. We thank Debra Murray for suggesting the  
393 name “TrackScar”. This work was supported in part by NIH (P50GM081883) and  
394 NSF (MCB1330545) awards to P. M. M.

## 395 **Author contributions**

396 C.S.M designed the experiments, carried out the experiments, analyzed data, and  
397 prepared the manuscript. P.M.M. designed the experiments, and prepared the  
398 manuscript

## 399 **Competing financial interests**

400 The authors declare no competing financial interests.

## 401 **Materials and correspondence**

402 Material requests and correspondence should be directed to Paul M. Magwene.

## 403 **References**

404 Aguilaniu, Hugo, Lena Gustafsson, Michel Rigoulet, and Thomas Nyström. 2003.

405 "Asymmetric Inheritance of Oxidatively Damaged Proteins During Cytokinesis.."

406 *Science* 299 (5613): 1751–53. doi:10.1126/science.1080418.

407 Avery, Simon V. 2006. "Microbial Cell Individuality and the Underlying Sources of

408 Heterogeneity." *Nat Rev Micro* 4 (8): 577–87. doi:10.1038/nrmicro1460.

409 Breslow, David K, Dale M Cameron, Sean R Collins, Maya Schuldiner, Jacob Stewart-

410 Ornstein, Heather W Newman, Sigurd Braun, Hiten D Madhani, Nevan J Krogan,

411 and Jonathan S. Weissman. 2008. "A Comprehensive Strategy Enabling High-

412 Resolution Functional Analysis of the Yeast Genome." *Nat Meth* 5 (8). Nature

413 Publishing Group: 711–18. doi:10.1038/nmeth.1234.

414 Bumgarner, Stacie L., Gregor Neuert, Benjamin F. Voight, Anna Symbor-Nagrabska,

- 415 Paula Grisafi, Alexander van Oudenaarden, and Gerald R Fink. 2012. "Single-Cell  
416 Analysis Reveals That Noncoding RNAs Contribute to Clonal Heterogeneity by  
417 Modulating Transcription Factor Recruitment." *Molecular Cell*. Cell Press.
- 418 Chernyakov, Irina, Felipe Santiago-Tirado, and Anthony Bretscher. 2013. "Active  
419 Segregation of Yeast Mitochondria by Myo2 Is Essential and Mediated by Mmr1  
420 and Ypt11.." *Current Biology : CB* 23 (18): 1818–24.  
421 doi:10.1016/j.cub.2013.07.053.
- 422 Dillin, Andrew, Daniel E. Gottschling, and Thomas Nyström. 2014. "The Good and the  
423 Bad of Being Connected: the Integrins of Aging.." *Current Opinion in Cell Biology*  
424 26 (February): 107–12. doi:10.1016/j.ceb.2013.12.003.
- 425 Fehrmann, Steffen, Camille Paoletti, Youlian Goulev, Andrei Ungureanu, Hugo  
426 Aguilaniu, and Gilles Charvin. 2013. "Aging Yeast Cells Undergo a Sharp Entry  
427 Into Senescence Unrelated to the Loss of Mitochondrial Membrane Potential.."  
428 *Cell Reports* 5 (6): 1589–99. doi:10.1016/j.celrep.2013.11.013.
- 429 Fehrmann, Steffen, Hélène Bottin-Duplus, Andri Leonidou, Esther Mollereau, Audrey  
430 Barthelaix, Wu Wei, Lars M Steinmetz, and Gaël Yvert. 2013. "Natural Sequence  
431 Variants of Yeast Environmental Sensors Confer Cell-to-Cell Expression  
432 Variability.." *Molecular Systems Biology* 9: 695. doi:10.1038/msb.2013.53.
- 433 Frederick, Rebecca L, Koji Okamoto, and Janet M Shaw. 2008. "Multiple Pathways  
434 Influence Mitochondrial Inheritance in Budding Yeast.." *Genetics* 178 (2).  
435 Genetics: 825–37. doi:10.1534/genetics.107.083055.
- 436 Goddard, Matthew R. 2008. "Quantifying the Complexities of *Saccharomyces*  
437 *Cerevisiae*'S Ecosystem Engineering via Fermentation." *Ecology* 89 (8).

- 438 Ecological Society of America: 2077–82. doi:10.1890/07-2060.1.
- 439 Hamilton, W D. 1966. “The Moulding of Senescence by Natural Selection.” *Journal of*  
440 *Theoretical Biology* 12 (1): 12–45.
- 441 Hartwell, L.H., and M W Unger. 1977. “Unequal Division in *Saccharomyces*  
442 *Cerevisiae* and Its Implications for the Control of Cell Division..” *The Journal of*  
443 *Cell Biology* 75 (2 Pt 1): 422–35.
- 444 Holland, Sara L, Tom Reader, Paul S Dyer, and Simon V. Avery. 2013. “Phenotypic  
445 Heterogeneity Is a Selected Trait in Natural Yeast Populations Subject to  
446 Environmental Stress..” *Environmental Microbiology*, August. doi:10.1111/1462-  
447 2920.12243.
- 448 Hutchinson, G E. 1957. “Concluding Remarks.” *Cold Spring Harbor Symposia on*  
449 *Quantitative Biology*, no. 22. Cold Spring Harbor Symposia on Quantitative  
450 Biology: 415–27.
- 451 Joseph, Sarah B, and David W Hall. 2004. “Spontaneous Mutations in Diploid  
452 *Saccharomyces Cerevisiae* More Beneficial Than Expected.” *Genetics* 168 (4).  
453 Genetics Society of America: 1817–25. doi:10.1534/genetics.104.033761.
- 454 Kennedy, B K, N R Austriaco, and L Guarente. 1994. “Daughter Cells of  
455 *Saccharomyces Cerevisiae* From Old Mothers Display a Reduced Life Span..” *The*  
456 *Journal of Cell Biology* 127 (6 Pt 2). Rockefeller Univ Press: 1985–93.  
457 doi:10.1083/jcb.127.6.1985.
- 458 Kispal, Gyula, Katalin Sipos, Heike Lange, Zsuzsanna Fekete, Tibor Bedekovics,  
459 Tamás Janáky, Jochen Bassler, et al. 2005. “Biogenesis of Cytosolic Ribosomes  
460 Requires the Essential Iron–Sulphur Protein Rli1p and Mitochondria.” *The EMBO*

- 461 *Journal* 24 (3). EMBO Press: 589–98. doi:10.1038/sj.emboj.7600541.
- 462 Lai, Chi-Yung, Ewa Jaruga, Corina Borghouts, and S Michal Jazwinski. 2002. “A  
463 Mutation in the ATP2 Gene Abrogates the Age Asymmetry Between Mother and  
464 Daughter Cells of the Yeast *Saccharomyces Cerevisiae*..” *Genetics* 162 (1): 73–87.
- 465 Levy, Sasha F., Naomi Ziv, and Mark L. Siegal. 2012. “Bet Hedging in Yeast by  
466 Heterogeneous, Age-Correlated Expression of a Stress Protectant.” *PLoS Biol* 10  
467 (5). Public Library of Science: e1001325EP–.  
468 doi:doi:10.1371/journal.pbio.1001325.
- 469 Liti, Gianni, David M Carter, Alan M Moses, Jonas Warringer, Leopold Parts, Stephen  
470 A James, Robert P Davey, et al. 2009. “Population Genomics of Domestic and  
471 Wild Yeasts.” *Nature* 458 (7236).
- 472 Maamar, Hédia, Arjun Raj, and David Dubnau. 2007. “Noise in Gene Expression  
473 Determines Cell Fate in *Bacillus Subtilis*..” *Science* 317 (5837). American  
474 Association for the Advancement of Science: 526–29.  
475 doi:10.1126/science.1140818.
- 476 Madigan, Michael T, John M Martinko, Kelly S Bender, Daniel H Buckley, and David A  
477 Stahl. 2015. *Brock Biology of Microorganisms*. 14 ed. Vol. 4. Boston: Pearson.
- 478 Marston, Adele L. 2014. “Chromosome Segregation in Budding Yeast: Sister  
479 Chromatid Cohesion and Related Mechanisms..” *Genetics* 196 (1): 31–63.  
480 doi:10.1534/genetics.112.145144.
- 481 McCusker, J H, K V Clemons, D A Stevens, and R W Davis. 1994. “Genetic  
482 Characterization of Pathogenic *Saccharomyces Cerevisiae* Isolates..” *Genetics*  
483 136 (4): 1261–69.

- 484 McFaline-Figueroa, José Ricardo, Jason Vevea, Theresa C Swayne, Chun Zhou,  
485 Christopher Liu, Galen Leung, Istvan R Boldogh, and Liza A Pon. 2011.  
486 “Mitochondrial Quality Control During Inheritance Is Associated with Lifespan  
487 and Mother-Daughter Age Asymmetry in Budding Yeast..” *Aging Cell* 10 (5).  
488 Blackwell Publishing Ltd: 885–95. doi:10.1111/j.1474-9726.2011.00731.x.
- 489 Pikuta, Elena V, Richard B Hoover, and Jane Tang. 2008. “Microbial Extremophiles at  
490 the Limits of Life.” *Critical Reviews in Microbiology* 33 (3). Taylor & Francis: 183–  
491 209. doi:10.1080/10408410701451948.
- 492 Pringle, J.R. 1991. “Staining of Bud Scars and Other Cell Wall Chitin with Calcofluor..”  
493 *Methods in Enzymology* 194: 732–35.
- 494 Salvadó, Z, F N Arroyo-López, J M Guillamón, G Salazar, A Querol, and E Barrio. 2011.  
495 “Temperature Adaptation Markedly Determines Evolution Within the Genus  
496 *Saccharomyces*..” *Applied and Environmental Microbiology* 77 (7). American  
497 Society for Microbiology: 2292–2302. doi:10.1128/AEM.01861-10.
- 498 Sinclair, David A, and Leonard Guarente. 1997. “Extrachromosomal rDNA Circles: a  
499 Cause of Aging in Yeast.” *Cell*. Cell Press.
- 500 Sinha, Himanshu, Bradly P Nicholson, Lars M Steinmetz, and John H McCusker. 2006.  
501 “Complex Genetic Interactions in a Quantitative Trait Locus.” *PLoS Genet* 2 (2).  
502 Public Library of Science: e13. doi:10.1371/journal.pgen.0020013.
- 503 Spudich, J L, and D E Koshland. 1976. “Non-Genetic Individuality: Chance in the  
504 Single Cell..” *Nature* 262 (5568): 467–71.
- 505 Steinmetz, Lars M, Himanshu Sinha, Dan R Richards, Jamie I Spiegelman, Peter J  
506 Oefner, John H McCusker, and Ronald W. Davis. 2002. “Dissecting the



- 507 Architecture of a Quantitative Trait Locus in Yeast. ." *Nature* 416 (6878): 326–  
508 30. doi:10.1038/416326a.
- 509 Stewart, Eric J., Richard Madden, Gregory Paul, and François Taddei. 2005. "Aging  
510 and Death in an Organism That Reproduces by Morphologically Symmetric  
511 Division." Edited by Thomas Kirkwood. *PLoS Biol* 3 (2). Public Library of  
512 Science: e45. doi:10.1371/journal.pbio.0030045.
- 513 Strobe, Pooja K, Daniel A. Skelly, Stanislav G Kozmin, Gayathri Mahadevan, Eric A  
514 Stone, Paul M. Magwene, Fred S Dietrich, and John H McCusker. 2015. "The 100-  
515 Genomes Strains, an *S. Cerevisiae* Resource That Illuminates Its Natural  
516 Phenotypic and Genotypic Variation and Emergence as an Opportunistic  
517 Pathogen.." *Genome Research* 25 (5). Cold Spring Harbor Lab: 762–74.  
518 doi:10.1101/gr.185538.114.
- 519 Vasi, Farida, Michael Travisano, and Richard E Lenski. 1994. "Long-Term  
520 Experimental Evolution in *Escherichia Coli*. II. Changes in Life-History Traits  
521 During Adaptation to a Seasonal Environment." *The American Naturalist* 144 (3).  
522 The University of Chicago Press for The American Society of Naturalists: 432–  
523 56. doi:10.2307/2462954.
- 524 Warringer, Jonas, Elke Ericson, Luciano Fernandez, Olle Nerman, and Anders  
525 Blomberg. 2003. "High-Resolution Yeast Phenomics Resolves Different  
526 Physiological Features in the Saline Response." *Proc Natl Acad Sci USA* 100 (26):  
527 15724–29.
- 528 Warringer, Jonas, Enikő Zörgö, Francisco A Cubillos, Amin Zia, Arne Gjuvsland, Jared  
529 T Simpson, Annabelle Forsmark, et al. 2011. "Trait Variation in Yeast Is Defined

530 by Population History.." *PLoS Genet* 7 (6). Public Library of Science: e1002111.

531 doi:10.1371/journal.pgen.1002111.

532 Ziv, Naomi, Mark L. Siegal, and David Gresham. 2013. "Genetic and Non-Genetic

533 Determinants of Cell-Growth Variation Assessed by High-Throughput

534 Microscopy.." *Molecular Biology and Evolution*, August.

535 doi:10.1093/molbev/mst138.

536

537

538 **Figures**

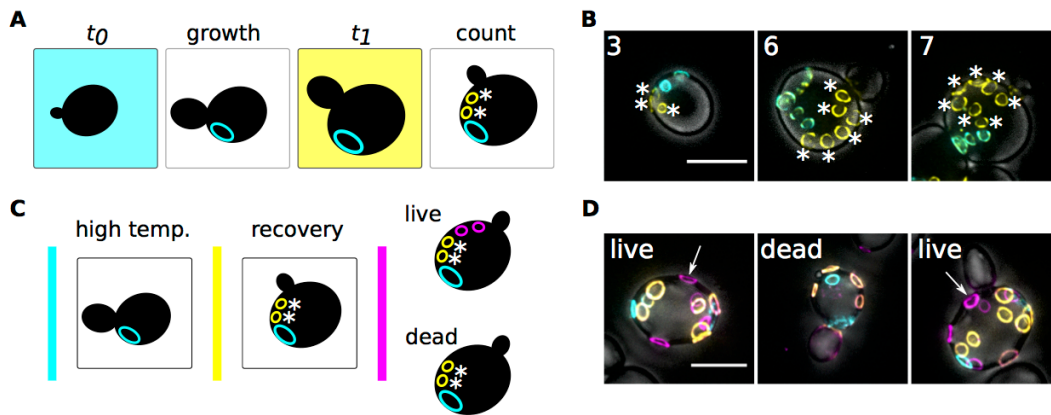

539

540 **Figure 1.** TrackScar measures the fecundity and viability of individual yeast. **A)** A  
541 schematic of two-color TrackScar is shown. To measure the reproductive output of  
542 individuals, cells are: 1) stained with wheat germ agglutinin (WGA) conjugated to  
543 Alexa488 (cyan) at  $t_0$ ; 2) grown in the absence of the stain; 3) stained with WGA  
544 conjugated to tetramethylrhodamine (yellow) at  $t_1$ . New buds (labeled with  
545 asterixes) are only stained by the second dye. **B)** Examples of haploid S288C cells  
546 that produced different numbers of daughters during 6 hr of growth at 30°C in YPD  
547 are shown. **C)** A schematic of three-color TrackScar is shown. Two colors of WGA  
548 (cyan and yellow) are used to measure the fecundity of cells during heat stress. To  
549 determine viability, the cells are transferred to permissive conditions and then  
550 stained with a third color of WGA (magenta). Viable cells produce new buds that are  
551 only stained by the third dye. **D)** Examples of diploid YJM693 cells that were either  
552 viable or inviable after exposure to growth at 35.5°C are shown. Arrows highlight  
553 one of the bud scars produced by live cells in permissive conditions. All micrographs  
554 are maximum intensity projections of z-stacks. Scale bar shows five microns.

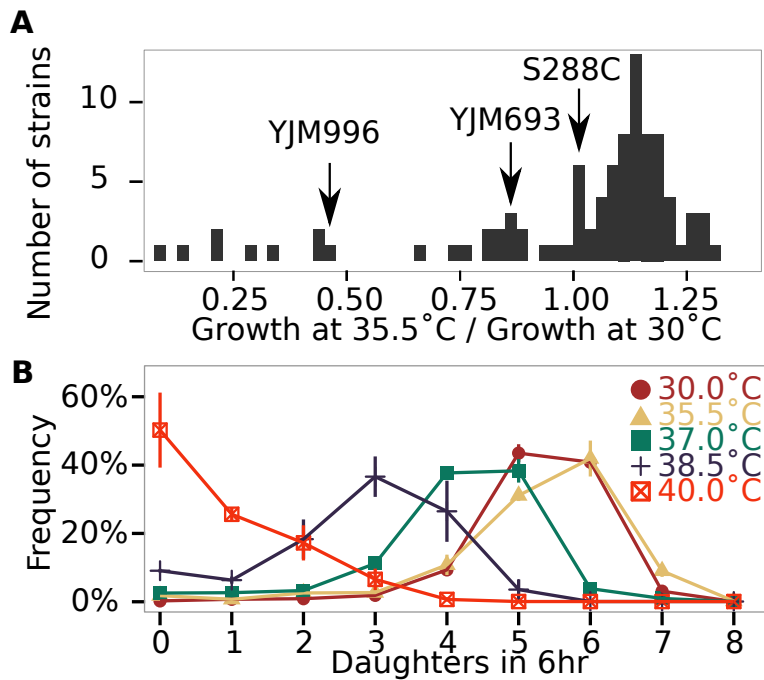

555

556 **Figure 2.** There is extensive genetic diversity in thermotolerance among  
557 environmental yeast isolates. **A)** A histogram of the growth rate of each of 93 yeast  
558 strains at 35.5°C normalized to their growth rate at 30°C is shown. **B)** Frequency  
559 polygons of the number of daughters produced by cells in the strain S288C during 6  
560 hr of growth at 30°C (brown circles), 35.5°C (gold triangles), 37°C (green squares),  
561 38.5°C (black crosses), and 40°C (red crossed boxes) are shown. Error bars are the  
562 standard error of the mean for three biological replicates.

563

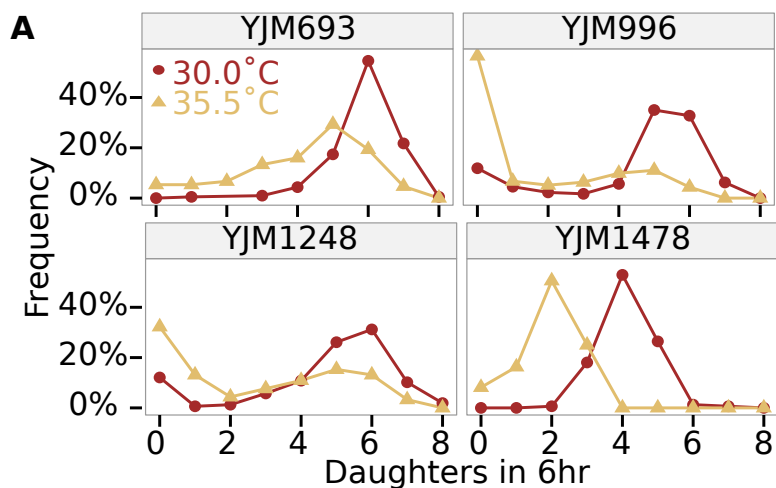

564

565 **Figure 3.** Strains that are sensitive to heat stress frequently have subpopulations  
566 with very low fecundity. Plots showing frequency polygons of the number of  
567 daughters produced in 6hr at 30°C (brown circles) and 35.5°C (gold triangles) are  
568 shown for **A)** robust and **B)** sensitive strains are shown. A single representative  
569 replicate is shown for each temperature for each strain.

570

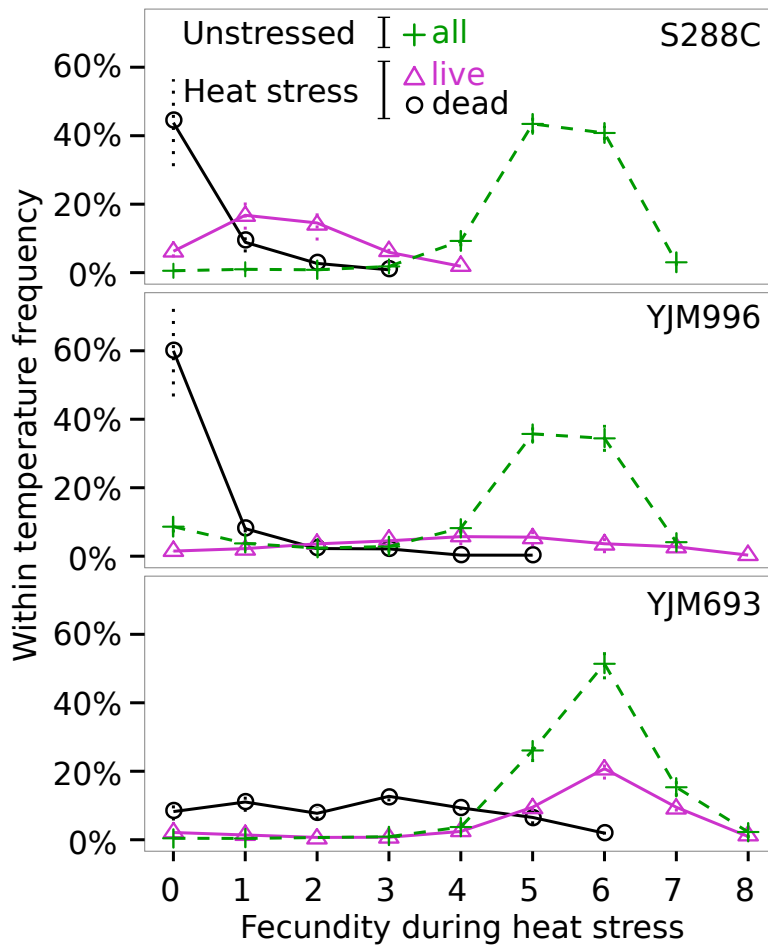

571

572 **Figure 4.** Mortality contributes to slow population growth in a genotype specific  
573 manner. Cells were heat stressed at either 35.5°C or 40°C, then assayed for viability  
574 at 30°C. The frequency polygons plot the fecundity during heat stress for cells that  
575 were subsequently classified as viable (magenta triangles) and inviable (black  
576 circles) from strains S288C, YJM996, and YJM693. The fecundity of unstressed cells  
577 is plotted as a dashed line with green crosses. Error bars are the standard error of  
578 the mean for three biological replicates.

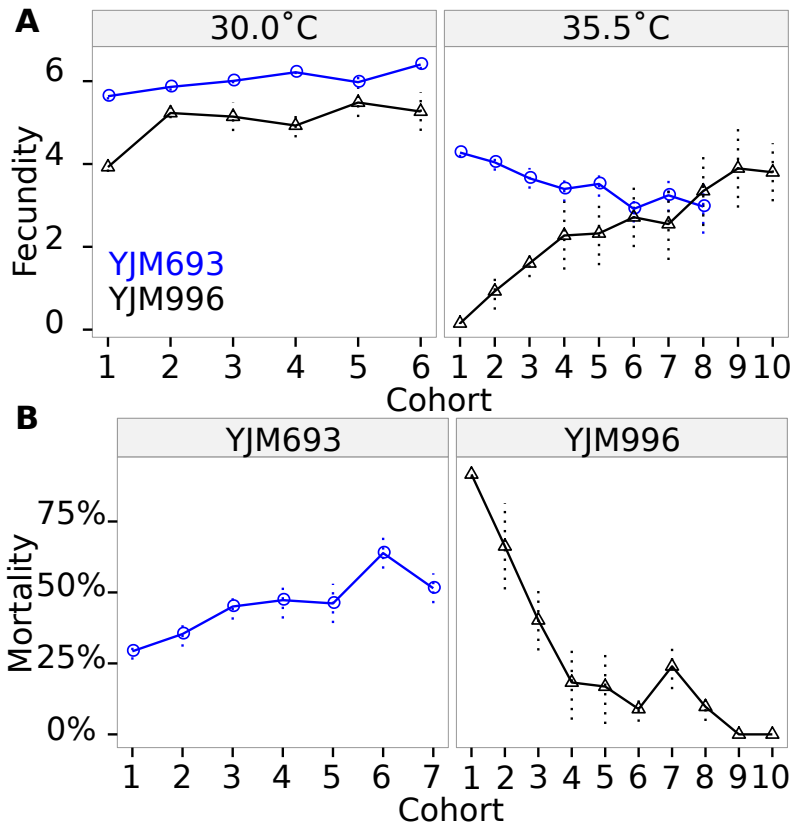

579

580 **Figure 5.** Genetic background determines the age structure of fecundity and  
581 mortality during heat stress. **A)** The average fecundity of a cohort during 6hr growth  
582 at either 30°C or 35.5°C for the strains YJM693 (blue circles) and YJM996 (black  
583 triangles). Error bars are the standard error of the mean for at least three biological  
584 replicates. Only cohorts with at least three cells in each of the three biological  
585 replicates are shown. **B)** The mortality of cohorts of YJM693 and YJM996 cells is  
586 shown. YJM693 cells were considered “dead” if they divided four times or fewer  
587 growth at 35.5°C, whereas YJM996 cells were considered “dead” if they did not  
588 divide at all during six hours of growth at 35.5°C. Error bars show the standard error  
589 of the mean for at least three biological replicates. Only cohorts with at least five  
590 cells in each of the three biological replicates are shown.

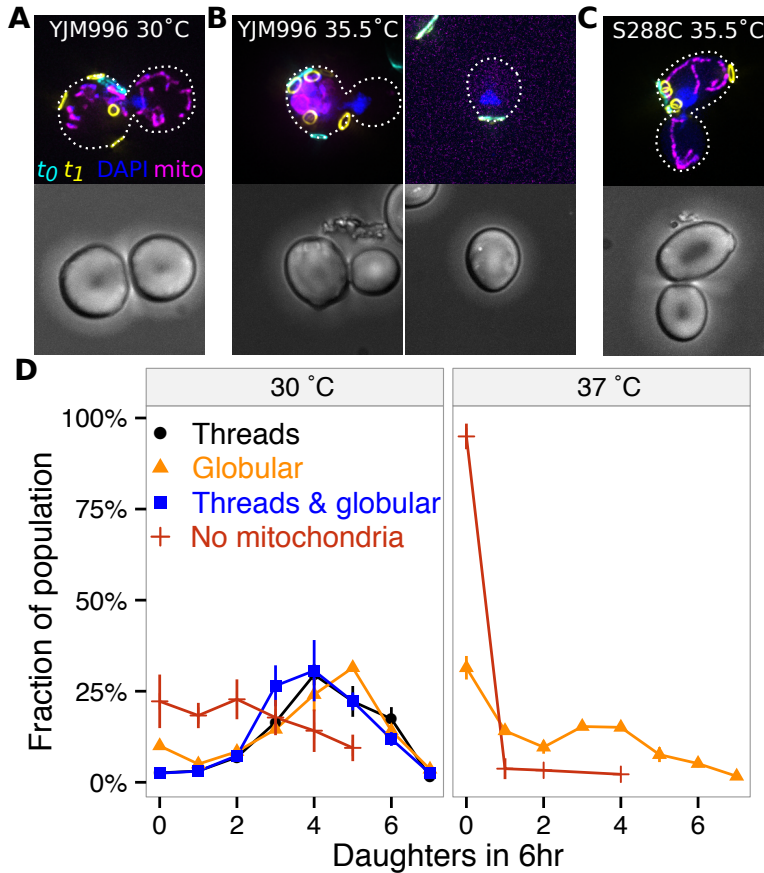

591

592 **Figure 6.** Early life mortality is associated with a defect in mitochondrial  
593 inheritance in the YJM996 genetic background. Representative images are shown of  
594 TrackScar staining at zero hours (cyan) and six hours (yellow), DAPI staining (blue),  
595 and mitochondria-localized GFP (magenta) for a *Δura3* derivative of the strain  
596 YJM996 at **A)** 30°C and **B)** 35.5°C, and a *Δura3* S288C derivative at **C)** 35.5°C. Each  
597 budding cell is staged in the process of nuclear division to facilitate comparison of  
598 mitochondrial inheritance. Dotted lines show the outlines of the cells. **D)** The  
599 fecundity of cells with thread-like mitochondrial morphology, globular morphology,  
600 a mixture of clumps and threads, and cells that lack mitochondria is shown for cells  
601 in the YJM996 genetic background at both 30°C and 35.5°C. Error bars show the  
602 standard error of the mean for three biological replicates of at least 150 cells.



1

**Supplementary information for:**

2

**The Quick and the Dead: Microbial Demography at the Yeast  
Thermal Limit**

3

4

Colin S. Maxwell<sup>1</sup> and Paul M. Magwene<sup>1\*</sup>

5

1. Department of Biology, Duke Center for Systems Biology, Duke University, Durham,  
NC 27708, USA

6

7

8

\* To whom correspondence should be addressed. Email: paul.magwene@duke.edu

9

## 10 **Supplementary Information Table of Contents**

### 11 **Supplementary Introduction**

### 12 **Supplementary Results**

13 TrackScar provides a sensitive measure for differences in fecundity

14 TrackScar minimally affects cellular physiology

15 Population growth rate and mean fecundity are well-correlated

16 Six hours of recovery is sufficient to distinguish live from dead cells

17 Heat stress can alter the distribution of ages in a population

### 18 **Supplementary Methods**

19 TrackScar Staining

20 Microscopy

21 Image Processing and Data Analysis

22 Data Collection and Microscopy for Time Series

23 Growth Curves

24 Strain Construction

### 25 **Supplementary References**

### 26 **Supplementary Figures**

27 *Figure S1.* TrackScar is sensitive and minimally affects cellular physiology

28 *Figure S2.* Correlation between TrackScar and growth curves

29 *Figure S3.* Growth rate of all strains as a function of temperature

30 *Figure S4.* Histograms of all strains analyzed using TrackScar

31 *Figure S5.* Age-structured fecundity of S288C

32 *Figure S6.* Distribution of ages during heat stress

33 *Figure S7* Penetrance of globular morphology phenotype

34 *Figure S8* Fecundity of cells with globular mitochondria

35 **Supplementary Tables**

36 *Table S1.* Strains used in this study

37

## 38 **Supplementary Results**

### 39 ***TrackScar minimally affects cellular physiology***

40           A potential concern with any vital-staining method is the possibility that it  
41 could change the cell physiological processes of interest. To explore this possibility,  
42 we compared division time estimates based on TrackScar to results from previous  
43 studies using timelapse microscopy. Using TrackScar we estimated the average  
44 division time to be 73.9 minutes for haploid cells of the genomic reference strain  
45 S288c grown in rich-media conditions. This is very similar to an estimate of 72.6  
46 minutes derived previously for this same strain using timelapse microscopy (Lord  
47 and Wheals 1981). To further explore the physiological impact of WGA staining on  
48 cellular division rates, we carried out a TrackScar experiment in which the time  
49 interval between the first and second stain was varied between one and six hours.  
50 We reasoned that if WGA staining is a significant cellular stress that the  
51 reproductive rates immediately following the first stain should be systematically  
52 lower than in later time points, because extended incubation would allow cells to  
53 recover from any physiological perturbations caused by staining. We carried out  
54 this experiment for nine genetically diverse *S. cerevisiae* strains. We found no  
55 evidence that reproductive rates at earlier time points were any lower than later  
56 time points (Fig. S1a). Indeed, our data show that cells at time points immediately  
57 following the first stain produce slightly more daughters than those at later time  
58 points (linear model;  $p = 0.03$ ). Taken together, these two sets of comparisons

59 suggest that TrackScar does not significantly perturb the division rate of *S. cerevisiae*  
60 cells.

### 61 ***TrackScar provides a sensitive measure of differences in fecundity***

62 To determine the sensitivity of TrackScar, we tested whether this method  
63 could detect the increased cell cycle time of daughter cells. *S. cerevisiae* reproduces  
64 by asymmetrical division, and smaller daughter cells must grow longer until they  
65 reach a critical size threshold before dividing for the first time (Hartwell and Unger  
66 1977). Thus, daughter cells should have lower fecundity than mother cells that had  
67 already divided at least once. Consistent with this expectation, daughter cells of  
68 haploid strain S288C produced an average of 4.9 daughters in a six-hour period,  
69 whereas mother cells produced an average of 5.4 daughters (Fig. S1b). This  
70 difference is significant (Paired t-test; n=3; p = 0.030). These results indicate that  
71 TrackScar can accurately detect small differences in fecundity between individual  
72 cells.

### 73 ***Population Growth Rate and Mean Fecundity Are Well Correlated***

74 The different growth rates of sensitive and robust strains provided another  
75 opportunity to test the accuracy of TrackScar. We used two-color TrackScar to  
76 estimate fecundity at 30C and 35.5C for 8 sensitive and 13 robust strains. We  
77 compared these estimates of average fecundity to the estimates of growth rate  
78 obtained from growth curves. The average fecundity of cells measured using

79 TrackScar and the maximum population growth rate measured by optical density at  
80 35.5C are well-correlated ( $r^2 = 0.58$ ; Fig. S2).

### 81 ***Six Hours of Recovery Is Sufficient To Distinguish Live from Dead Cells***

82 Three-Color TrackScar relies on a sufficiently long recovery phase to  
83 distinguish between live and dead cells. We tested whether six hours is sufficient to  
84 distinguish live from dead cells by determining if YJM693 cells that did not divide  
85 after six hours of recovery would subsequently form a colony on an agar plate.

86 We grew YJM693 to early-log phase at 35.5C as and stained the cells with  
87 Ax488-WGA as described in the methods for the TrackScar protocol. After washing  
88 off the stain, we spread the cells on a plate of YPD and randomly selected cells from  
89 the patch of cells on the plate. Cells were immediately singled and subsequently  
90 moved into a grid on the YPD plate. If a cell divided in between the time that the cell  
91 was singled and when it was moved to the grid, both the mother cell and its progeny  
92 were placed in the same space on the grid. The plate was incubated for 6hr at 30C  
93 and colonies were inspected for new daughter cells using a microscope. After 48hr,  
94 the number of colonies formed by founder cells was recorded. Out of 24 cells that  
95 did not divide after six hours of recovery at 30, only one of these these cells  
96 subsequently divided in the next 48 hours. This indicates that six hours of recovery  
97 in good conditions is adequate to distinguish live cells from dead cells.

98

## 99 ***Heat stress can alter the distribution of ages in a population***

100 In an exponentially growing yeast population, the frequency of cells of age  $n$   
101 in the population would be approximately  $1/2^n$  if age had no influence on fecundity  
102 or mortality (the asymmetric division of yeast leads to a more complicated actual  
103 distribution of ages that approximates  $1/2^n$  when the doubling time of the  
104 population is short (Lord and Wheals 1980)). Therefore, without specifically  
105 enriching for old cells, it should be quite rare to observe cells that have budded  
106 more than about ten times as they should make up less than 1 in 1,000 cells in the  
107 population. However, as described above, heat stress can induce changes in age  
108 related patterns of fecundity and mortality. One would predict therefore that some  
109 stress related changes, particularly those that deplete young cells, could be  
110 sufficient to alter population demography broadly.

111 We found that in the absence of heat stress, the distribution of ages in the  
112 populations of all three strains approximately matched the  $1/2^n$  expectation,  
113 consistent with no influence of age. Furthermore, neither YJM693 nor S288C  
114 showed significantly different age distributions at 30°C and 35.5°C (Kolmogorov-  
115 Smirnov test,  $p > 0.3$ ). However, YJM996 had a significantly different distribution of  
116 ages during growth at 35.5°C (Kolmogorov-Smirnov test,  $p = 1.74 \times 10^{-7}$ ). This  
117 difference is due to a strong enrichment of cells older than five buds and a depletion  
118 of cells between 2 and 4 buds (Fig. S6). Consequently, we frequently found cells with  
119 more than 15 buds in YJM996 populations during growth at 35.5°C. This is  
120 consistent with the low fecundity and increased mortality we observed in young

121 cells and indicates that heat stress can substantially alter the age distribution of a  
122 population of cells by affecting their demographic rates.

## 123 **Supplementary Methods**

### 124 ***TrackScar Staining***

125 All of our experiments were conducted using recently clonal cell lines in  
126 early- to mid-log-phase growth, grown in YPD media (Sherman 2002), except for  
127 experiments to visualize mitochondrial morphology, which were conducted in  
128 synthetic media lacking uracil with 2% dextrose (SC-ura) media. To begin each  
129 experiment, frozen stocks were streaked onto YPD or SC-ura plates to obtain single  
130 colonies and incubated at 30°C. After 24 to 48 hrs, single colonies were inoculated  
131 into 2ml of YPD or SC-ura overnight at 30°C.

132 To obtain log-phase cells, overnight cultures were diluted 1:100 and then in a  
133 1:4 serial dilution in the columns of a 96 well plate. The final volume in each well of  
134 the plate was 150µl. The diluted cells were then placed in an incubator and shaken  
135 at 500rpm at the desired temperature for at least 16 hr. Dilutions containing  
136 putative early log-phase cultures were located by examining the optical density of  
137 cells by eye and were then counted in a hemocytometer. A dilution whose  
138 concentration was between  $0.7 \times 10^6$  and  $7 \times 10^6$  cells/ml was chosen.

139 Log-phase cells were gently spun out of solution by centrifugation at 500xg  
140 for 1.5 minutes. All centrifuge steps on live cells were done at this speed. Cells were  
141 stained in 60µl of fresh media with 33µg/ml wheat germ agglutinin (WGA)



142 conjugated to Alexa488 (Invitrogen, W11261) at 30C for 15 min on a rotor. Cells  
143 were washed once in 200µl of fresh media then diluted to  $0.33 \times 10^6$  cells/ml in one  
144 column of a 96 well plate. Cells were then placed back in the incubator for 6 hr.

145 To fix the cells for subsequent imaging, cells were spun out of solution at  
146 5,000xg for 2 minutes. All subsequent centrifugation steps were done at this speed.  
147 Cells were resuspended in 500µl of sterile PBS. Cells were fixed by adding 100µl of  
148 37% formaldehyde to the PBS and incubating at room temperature for at least 15  
149 minutes. Cells were washed once in sterile PBS then resuspended in sterile PBS and  
150 stored at 4°C in the dark until imaging. Cells were generally imaged less than a week  
151 after collection, but the staining was stable for at least three months.

152 Immediately prior to imaging, cells were spun out of PBS and resuspended in  
153 60µl of fresh media with WGA conjugated with tetramethylrhodamine (Invitrogen,  
154 W849) for 15 minutes at 30°C on a rotor. Cells were washed 1x in 500µl of sterile  
155 PBS, then sonicated in six short bursts using a Branson Sonifier 150 at setting 4 to  
156 break up any clumps.

157 For experiments examining mitochondrial morphology, TrackScar staining  
158 was performed as above, except the first WGA stain was WGA-TMR and the second  
159 WGA stain six hours later was WGA-640CF (Biotium).

160 For the “Three-Color TrackScar” experiments used to determine if cells with  
161 low fecundity during heat stress would divide subsequently after incubation at 30C,  
162 cells were: 1) stained as above with WGA-Ax488 at the beginning of the experiment;  
163 2) stained as above with WGA-640CF after 6hr of incubation at either 35.5°C or

164 40°C; 3) stored overnight at 4°C in YPD (for experimental convenience); 4)  
165 incubated in YPD for 6hr at 30C on a rotor drum; 5) fixed with formaldehyde as  
166 above and stored, and; 6) stained as above with WGA-TMR.

## 167 **Microscopy**

168 To count the stained bud scars for all experiments except for the time series  
169 in Fig. S1 (see below), cells were imaged on a DeltaVision wide-field fluorescent  
170 microscope using a 100x lens. Since cells that do not have the first stain (WGA-  
171 Ax488) do not have any information about the number of daughters produced by  
172 the cell, we randomly imaged cells that were stained with the first stain. To find cells  
173 to image, we moved in transects along the slide and imaged each cell that had  
174 staining in the Ax488 channel. The exception to this was when we sought out old  
175 cells specifically in order to measure the fecundity or mortality of older cohorts. In  
176 this case, we counted the number of buds that were visible in the Ax488 channel and  
177 ignored young cells.

178 For each field of view containing a cell, ten- to twelve-micron deep z-stacks  
179 with 0.2 to 0.4 micron slices were collected at every point with a 0.1 second  
180 exposure with filter sets appropriate for each fluorophore being used in that  
181 experiment. The depth of the z-stacks was chosen to ensure that both sides of every  
182 cell were imaged. To visualize cell outlines, z-stacks of Nomarski bright-field images  
183 were collected with a 0.025 second exposure. Either 768x768 or 1024x1024 images  
184 were collected. Z-stacks were deconvolved using the default settings of the  
185 DeltaVision software. The deconvolved z-stacks were cropped to remove

186 deconvolution artifacts. Each channel was projected onto a single slice using a  
187 maximum pixel intensity projection. At least 150 images (containing at least one  
188 cell) for each sample were collected.

189 To generate images for display items in the figures, the brightness and  
190 contrast of each cell and each channel was adjusted independently so that the first  
191 stain would be visible. The gamma of the brightfield channel was sometimes  
192 adjusted in order to remove saturated pixels that made display of the brightfield  
193 image difficult.

#### 194 ***Image processing and data analysis***

195 The projected images of each z-stack were assembled into TIFF stacks using  
196 a custom Python script and ImageMagick. Individual cells with the first TrackScar  
197 stain (either Ax488 or TMR) were cropped from the wider images using custom  
198 ImageJ macros. To count the bud scars, a false-color image of the individual cell was  
199 displayed. To aid in the counting, we wrote ImageJ macros that allowed the rapid  
200 toggling of different channels. Each bud scar in each channel was counted using the  
201 following rules: 1) the birth scar is always counted as the first scar; 2) if a bud scar  
202 has any staining of the previous stain that is visible at a normal brightness and  
203 contrast level, then that bud scar is counted as being stained by that stain; 3) bud  
204 scars that correspond to daughter cells still attached to the mother cell are not  
205 counted unless the daughter cell has divided (has a bud scar besides its birth scar).

206 Mitochondrial morphology for Fig. S7 was scored by examining at least 100  
207 random cells for each biological replicate in an Axio Imager and using a 100x lens.

208 The field aperture was adjusted so that only one cell was visible at a time, and each  
209 cell on a transect was scored. The presence of clumps of mitochondria and  
210 mitochondrial threads was scored by examining cells using the appropriate filterset  
211 for GFP. Mitochondrial morphology for Fig. S8 was scored by examining maximum  
212 projections of Z-stacks created using a DeltaVision microscope as above for at least  
213 150 cells for each biological replicate. The presence of clumps of mitochondria and  
214 mitochondrial threads was scored before examining the TrackScar staining for each  
215 cell.

216 All statistical tests were performed using R (R Core Team 2015). To estimate  
217 the division rate of haploid S288C cells, we fit a linear model to a plot of buds  
218 produced as a function of time. To test for the effect of age on the average fecundity  
219 of a cohort, we computed the average fecundity of the cohort of each strain for three  
220 biological replicates and fit a linear model to those averages.

### 221 ***Data collection and microscopy for time series***

222 To collect the time series in Fig. S1, we used the diploid strains YJM1529,  
223 YJM1549, YJM1573, YJM195, YJM554, YJM555, YJM693, and S288C as well as  
224 haploid S288C cells. TrackScar staining was done as above except the time between  
225 the two stains was varied between one and six hours. To count the number of  
226 daughters produced by cells in the time series in Fig. S1, the number of buds on at  
227 least fifteen random cells stained by each stain were counted were counted using an  
228 Axio Imager and a 100x lens in “real time” (without acquiring images). To see buds  
229 on both sides of the cell, the plane of focus was moved up and down.

230 ***Growth curves***

231 To measure the maximum population growth rate of strains in the 100  
232 genomes collection, 93 strains (see Table 1) were grown overnight in a 96 well plate  
233 with 100 $\mu$ l of YPD per well at the desired temperature on a plate shaker at 280rpm.  
234 Cultures were mixed and diluted 1:5000 into a 96 well plate with 100 $\mu$ l of YPD per  
235 well. Growth curves were measured in a Tecan Sunrise plate reader. Measurements  
236 were collected every 15min for 48hr with 30s of shaking at the highest setting  
237 before each measurement. Four biological replicates were collected for the  
238 temperatures 30°C and 35.5°C and at least two replicates were collected for all  
239 other temperatures.

240 The maximum growth rate of a culture was calculated using non-parametric  
241 smoothing using the “cellGrowth” package from Bioconductor. To identify strains  
242 sensitive to heat stress, we looked for strains whose maximum population growth  
243 rate at 35.5°C was 93% or lower than their growth rate at 30°C. This cutoff was  
244 chosen because S288C populations grew 94% as quickly at 35.5°C at 30°C.

245 ***Strain construction***

246 To generate the uracil auxotrophs CMY145 and CMY146 in the YJM693 and  
247 YJM996 genetic background, respectively, the URA3 gene was disrupted by a  
248 KanMX3 cassette. The plasmid M3927 (Voth, Wei Jiang, and Stillman 2003) (aka  
249 PMB161) was digested using BamHI, then transformed into YJM693 and YJM996  
250 using LiAc/PEG transformation (Gietz and Schiestl 2007). G418 resistant colonies

251 were checked for the insertion of the cassette using colony PCR and strains with the  
252 insertion of the cassette were sporulated. Tetrads were dissected and G418  
253 resistant, uracil auxotrophs were identified by replica plating. To visualize  
254 mitochondrial morphology, the plasmid p416-GPD-mito-roGFP1 (aka PMB273)  
255 (McFaline-Figueroa et al. 2011)(a kind gift from Liza Pon) was transformed into  
256 CMY145, CMY146, and PMY044 (a uracil auxotroph in the S288C background) to  
257 yield CMY177, CMY178, and CMY182, respectively.

258

## 259 **Supplementary References**

260

261 Gietz, R Daniel, and Robert H Schiestl. 2007. "High-Efficiency Yeast Transformation  
262 Using the LiAc/SS Carrier DNA/PEG Method.." *Nature Protocols* 2 (1): 31–34.

263 doi:10.1038/nprot.2007.13.

264 Hartwell, L.H., and M W Unger. 1977. "Unequal Division in Saccharomyces

265 Cerevisiae and Its Implications for the Control of Cell Division.." *The Journal of*

266 *Cell Biology* 75 (2 Pt 1): 422–35.

267 Lord, P G, and A E Wheals. 1980. "Asymmetrical Division of Saccharomyces

268 Cerevisiae.." *J. Bacteriol.* 142 (3). American Society for Microbiology: 808–18.

269 Lord, P G, and A E Wheals. 1981. "Variability in Individual Cell Cycles of

270 *Saccharomyces Cerevisiae* ." *Journal of Cell Science* 50 (August): 361.

271 McFaline-Figueroa, José Ricardo, Jason Vevea, Theresa C Swayne, Chun Zhou,

272 Christopher Liu, Galen Leung, Istvan R Boldogh, and Liza A Pon. 2011.

273 "Mitochondrial Quality Control During Inheritance Is Associated with Lifespan

274 and Mother-Daughter Age Asymmetry in Budding Yeast.." *Aging Cell* 10 (5).

275 Blackwell Publishing Ltd: 885–95. doi:10.1111/j.1474-9726.2011.00731.x.

276 Sherman, Fred. 2002. "Getting Started with Yeast.." *Methods in Enzymology* 350: 3–

277 41.

278 Voth, Warren P, Yi Wei Jiang, and David J Stillman. 2003. "New 'Marker Swap'

279 Plasmids for Converting Selectable Markers on Budding Yeast Gene Disruptions

280 and Plasmids." *Yeast* 20 (11). John Wiley & Sons, Ltd.: 985–93.

281 doi:10.1002/yea.1018.

## 282 Supplementary Figures

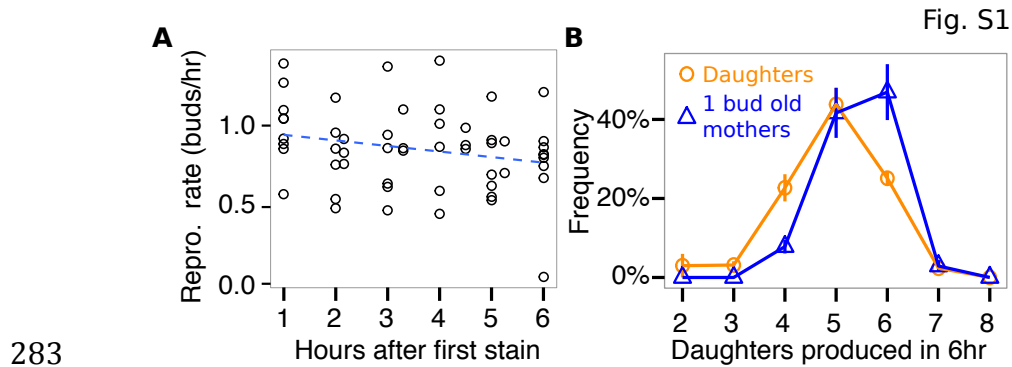

284 **Figure S1.** TrackScar is sensitive and minimally affects cellular physiology. **A)** The  
285 average number of daughters produced in a one hour interval by cells in nine  
286 genetically diverse yeast strains is shown as a function of time since the first WGA  
287 stain. A linear regression line is plotted as a blue dashed line. **B)** Histograms of the  
288 number of daughters produced by daughter cells (orange circles) and mother cells  
289 that had divided once (blue triangles) in a 6hr interval for are shown. Error bars  
290 show the standard error of the mean for three biological replicates.



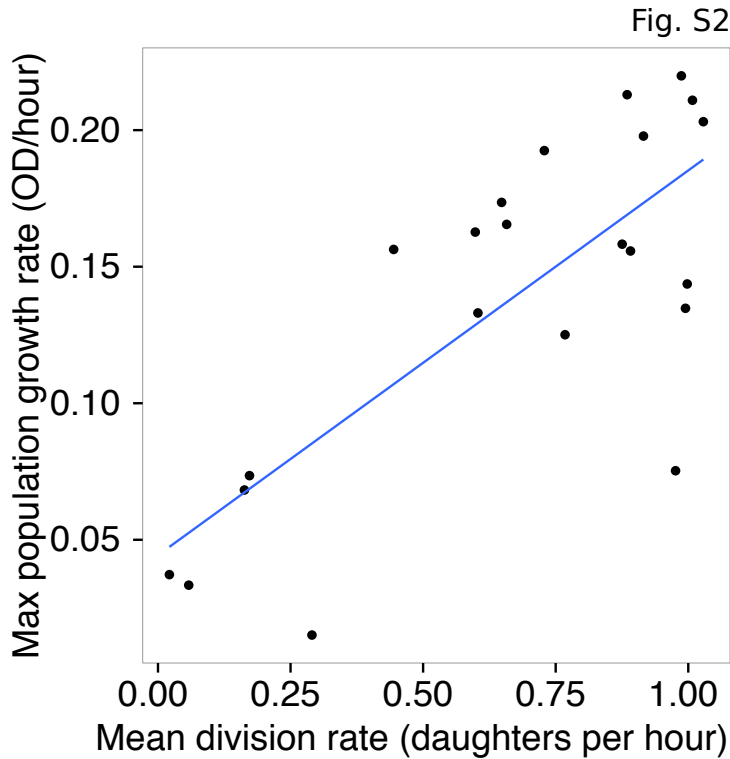

291

292 **Figure S2.** Estimates of the growth rate of a population made using TrackScar and

293 growth curves are well-correlated. A scatter plot of the max growth of a population

294 inferred by measuring its rate of increase in a spectrophotometer and the average

295 fecundity of a population measured using TrackScar is shown for a diverse panel of

296 yeast strains grown at 35.5C. A linear regression line is shown in blue.

297

298

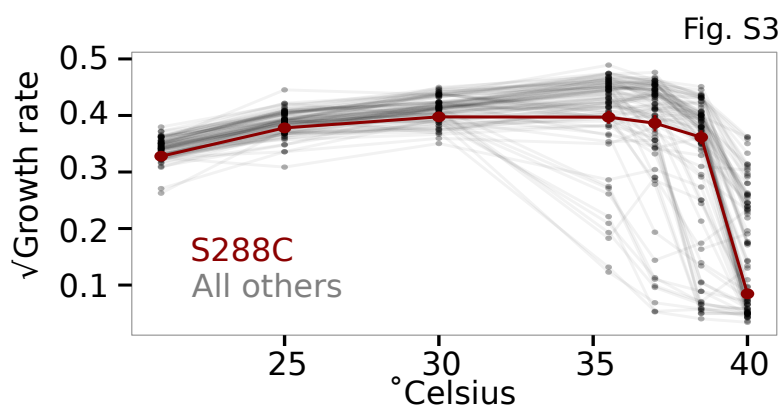

299

300 **Figure S3.** There is extensive genetic diversity in thermotolerance among

301 environmental yeast isolates. The square-root of the maximum growth of each of 93

302 yeast strains is shown as a function of temperature. The strain S288C is shown in

303 red.

304

305

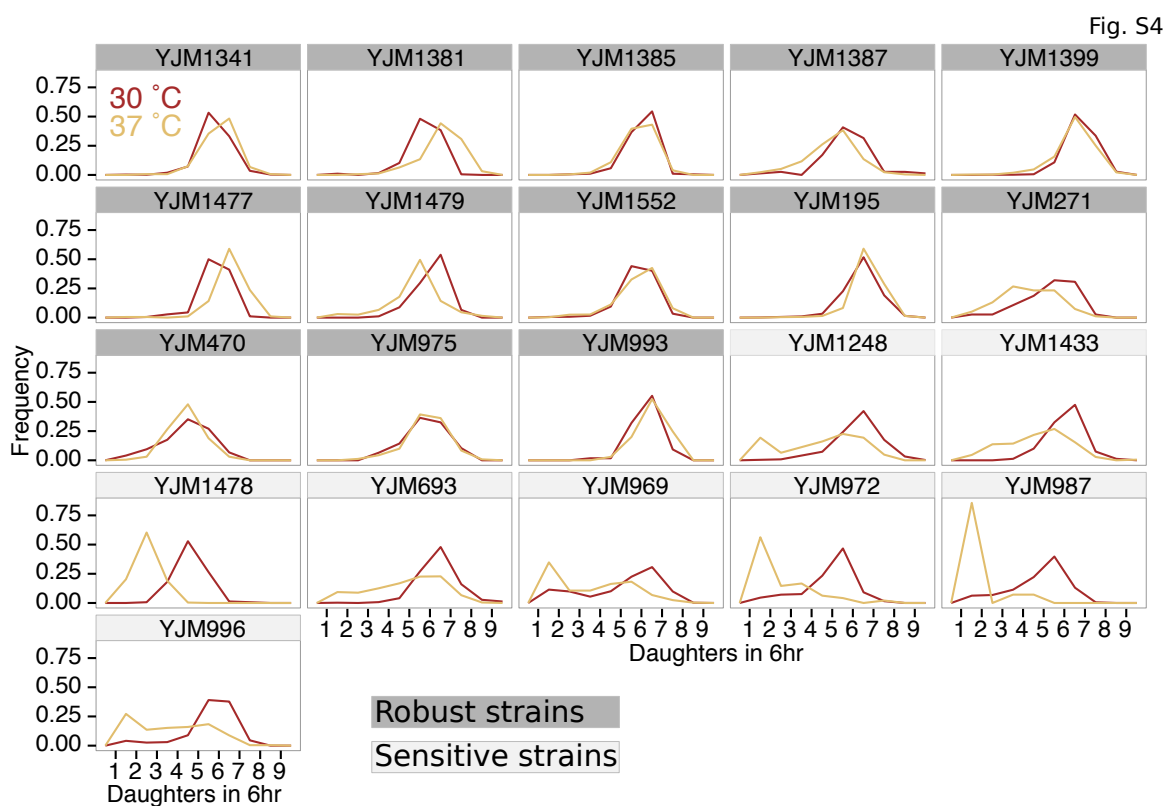

306

307 **Figure S4.** Sensitive strains frequently show sub-populations of cells with very low  
308 fecundity. Plots showing histograms of the number of daughters produced in 6hr at  
309 30C (brown) and 35.5C (gold) are shown for all strains that were examined using  
310 TrackScar. Strains that are robust to heat stress have their facet labels colored in  
311 dark grey.

Fig. S5

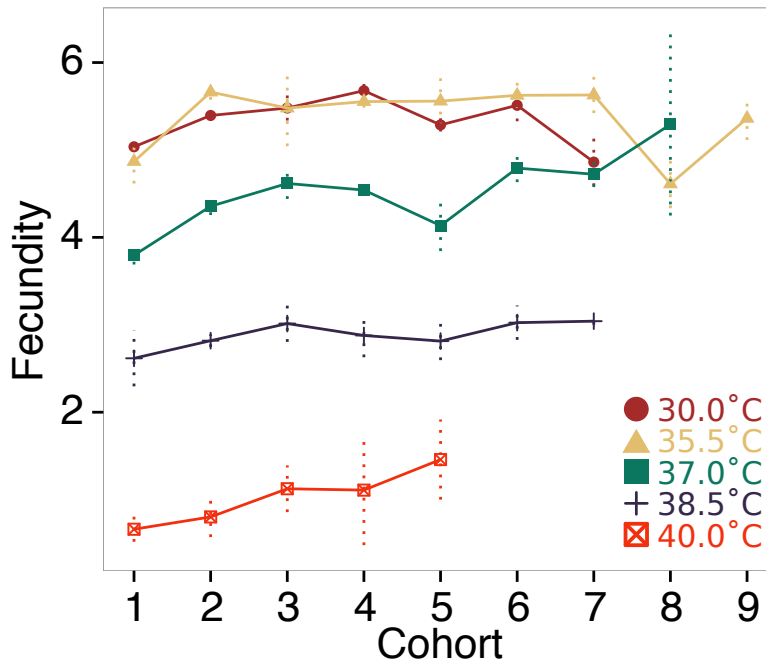

312

313 **Figure S5.** The fecundity of S288C cells is not age structured at any temperature.

314 The average fecundity of cohorts of S288C cells during 6hr during growth at 30C

315 (brown circles), 35.5C (gold triangles), 37C (green squares), 38.5C (black crosses),

316 and 40C (red crossed boxes). Error bars are the standard error of the mean for at

317 least two biological replicates. Only cohorts with at least three cells in each of the

318 biological replicates are shown.

319

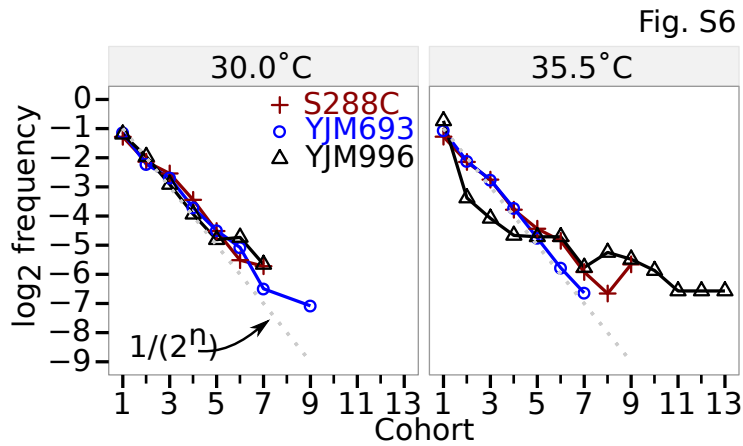

320

321 **Figure S6.** Heat stress can alter the distribution of ages in a population. The  
322 frequency of cells in a cohort in a sample of randomly chosen cells at 30C and 35.5C  
323 is shown for the strains S288C (red crosses), YJM693 (blue circles), and YJM996  
324 (black triangles) is shown. The grey dotted line shows  $1/(2^n)$ . Each point represents  
325 the pooled observations across at least three biological replicates. Only cohorts with  
326 at least five total cells are shown.

327

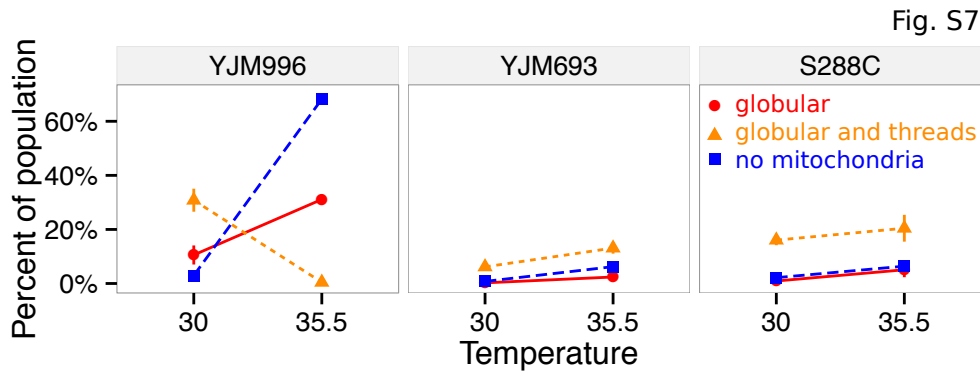

328

329 **Figure S7.** Heat stress changes the frequency of cells with abnormal mitochondrial

330 morphology in the strain YJM996. The percentage of the population with abnormal

331 mitochondria at 30°C and 35.5°C is shown for the strains CMY177 (YJM693 genetic

332 background), CMY178 (YJM996 genetic background), and CMY182 (S288C genetic

333 background). Mitochondria were grouped into the classes: globular (red circles),

334 globular with some threads (orange triangles), and no mitochondria (blue squares).

335 Error bars show the standard error of the mean for three biological replicates of at

336 least 100 cells.

### 337 **Supplementary Tables**

338 **Supp. Table 1** Strains used in this study. See attached file "TableS1 - strains.xlsx"
